# Supplementary material for: Mask family proteins ANKHD1 and ANKRD17 regulate YAP nuclear import and stability
Source: eLife journal article supplement (doi:10.7554/elife.48601), 2019-10-29
Supplement: supp [file elife-48601-supp-v1.zip]

Archive with 7 entries (7 files):
- elife_poa_e48601_Transparent_Reporting_File.pdf
- elife_poa_e48601_Figure_1_figure_supplement_1.jpg
- elife_poa_e48601_Figure_2_figure_supplement_1.jpg
- elife_poa_e48601_Table_1_source_data_1.xlsx
- elife_poa_e48601_Figure_5_figure_supplement_3.jpg
- elife_poa_e48601_Figure_5_figure_supplement_1.jpg
- elife_poa_e48601_Figure_5_figure_supplement_2.jpg
