# Supplementary material for: Mask family proteins ANKHD1 and ANKRD17 regulate YAP nuclear import and stability
Source: eLife journal article supplement (doi:10.7554/elife.48601), 2019-10-29
Supplement: supp [file elife-48601-supp-v1.zip › elife_poa_e48601_Table_1_source_data_1.xlsx]

## Sheet: Fig1E
WT N/C	Mask1022 N/C
0.566074	0.400353
0.570545	0.482145
0.670672	0.41346
0.55546	0.470847
0.834202	0.657273
0.814696	0.500614
0.66888	0.745049
0.796226	0.602275
0.792181	0.706843
0.71877	0.550828

## Sheet: Fig1F
WT N/C	Mask1022 N/C
1.88036	0.415743
1.45505	0.460554
1.74177	0.414276
1.63414	0.287513
1.91505	0.543179
1.83614	0.355871
1.4859	0.569333
1.72769	0.757248
1.36365	0.546653
1.4793	0.316954

## Sheet: Fig2D
WT N/C	Mask deltaNLS N/C
1.176	0.779245
1.2743	0.579321
0.680462	0.742159
0.920876	0.547824
1.02295	0.983672
1.39341	0.644223
1.76862	0.83795
0.959992	0.522387
0.658176	0.512502
0.676621	0.570509
0.869619	0.518779
1.47302	0.682442
1.02895	0.665749
1.55034	0.839838
1.09641	0.600784
0.782409	0.824868
1.82246	0.499705
1.1688	0.532515
1.03616	0.736842
1.46647	0.544139
0.913547	0.484016

## Sheet: Fig4E
MARCM82B FRT82B			MARCM82B FRT82B mask10.22			MARCM82B UAS.Yki-NLS-HA FRT82B			MARCM82B UAS Yki NLS FRT82B mask10.22
disc1 (series 079)1	0.678		(018) 1	0.125		disc 1 (047) 1	1.904		1	1.146
2	0.299		2	0.057		2	0.713		2	1.299
3	0.113		3	0.098		3	2.328		3	0.942
4	0.185		4	0.067		4	0.679		4	0.547
5	0.59		5	0.204		5	0.806		5	1.009
6	0.358		6	0.025		6	0.588		6	0.417
7	1.063		(025) 1	0.033		7	0.39		7	0.312
disc 2 (075) 1	0.532		2	0.303		8	1.006			0.299
2	0.132		3	0.26		disc2 (054) 1	4.802		2	0.13
3	0.336		4	0.089		2	2.618		3	0.099
4	0.338		5	0.021		3	1.515		4	0.24
5	0.958		6	0.016		4	0.773		5	0.415
6	0.88		(028) 1	0.276		5	0.596		6	0.361
7	0.703		2	0.024		6	3.808		(032) 1	0.802
disc3 (068) 1	0.427		3	0.088		7	1.211		2	1.841
2	0.899		4	0.368		8	0.381		3	0.806
3	0.58		5	0.133		9	1.602		4	1.875
4	0.535		6	0.069		10	0.82		5	0.651
5	0.361		7	0.151		disc3 (019) 1	2.27		6	0.641
6	0.351		8	0.696		2	0.497		7	0.282
7	0.299		(046) 1	0.086		3	0.142		8	0.667
disc 4 (065) 1	0.498		2	0.285		4	0.711		9	0.607
2	0.575		3	0.329		5	0.758		10	2.371
3	0.802		4	0.123		6	1.499		11	0.466
4	0.402		5	0.162		7	0.717		12	0.436
5	0.679		6	0.26		8	0.553		13	0.545
6	1.056		7	0.24		9	0.417		(039) 1	0.162
7	0.224		(011) 1	0.02		disc4 (034) 1	2.772		2	0.022
disc 5 (063) 1	0.375		2	0.013		2	1.678		3	0.056
2	1.098		3	0.01		3	2.399		4	0.077
3	0.754		4	0.049		4	3.321		5	0.016
4	0.258					disc5 (013) 5	0.722		6	0.352
5	0.291					6	0.161		7	0.704
6	0.41					7	0.202		8	0.035
7	0.163					8	0.642		9	0.019
						9	1.526		10	0.549
						disc 6 (012) 1	1.951		11	0.844
						2	2.177		12	0.387
						3	0.901		13	0.043
						4	1.225		14	0.115
						disc7 (060) 1	1.302		15	0.556
						2	0.372		(022) 1	0.453
						3	0.451		2	0.471
						4	0.886		3	0.753
						5	1.127		4	2.051
						6	0.957		5	2.132
						7	0.371		6	0.488
						8	0.562		7	0.504
						9	1.914		8	0.064

## Sheet: Fig5B
Control Ratio	Mask1 siRNA Ratio
1.21609	0.589823
1.22766	0.432905
0.979835	0.595741
0.987064	0.38336
1.02232	0.604499
1.18218	0.616359
1.09133	0.498354
0.986929	0.393267
0.668483	0.528498
1.42605	0.605704
1.13445	0.37383
1.24247	0.454133
1.0341	0.41391
0.922053	0.510351
1.67402	0.31389
1.20282	0.54407
1.77954	0.647496
0.981107	0.420174
0.823074	0.520448
1.00529

## Sheet: FigS1
			Luciferase	Renilla
Content	Well Row	Well Col	Raw Data	Raw Data	Luc/Renilla
G4	D	1	534	653576	0.000817043		0
	D	2	326	572809	0.000569125		0
	D	3	278	593496	0.000468411		0
	D	4	279	539034	0.000517593		0
	D	5	461	531553	0.00086727		0
	D	6	477	442168	0.00107878	0.000719703	7.19703e-07
G4 Yki	D	7	15101	381585	0.0395744		0
	D	8	21416	410064	0.052226		0
	D	9	11210	450446	0.0248864		0
	D	10	14690	385565	0.0380999		0
	D	11	12536	297334	0.0421613		0
	D	12	12803	272906	0.0469136	0.0406436	4.06436e-05
G4 NLS ANKRII+KH	C	7	306	251200	0.00121815		0
	C	8	214	237238	0.000902048		0
	C	9	246	237868	0.00103419		0
	C	10	269	207591	0.00129582		0
	C	11	193	284924	0.000677374		0
	C	12	185	248743	0.00074374	0.000978553	9.78553e-07
