# Supplementary figures and images for: Mask family proteins ANKHD1 and ANKRD17 regulate YAP nuclear import and stability
Source: eLife journal article supplement (doi:10.7554/elife.48601), 2019-10-29

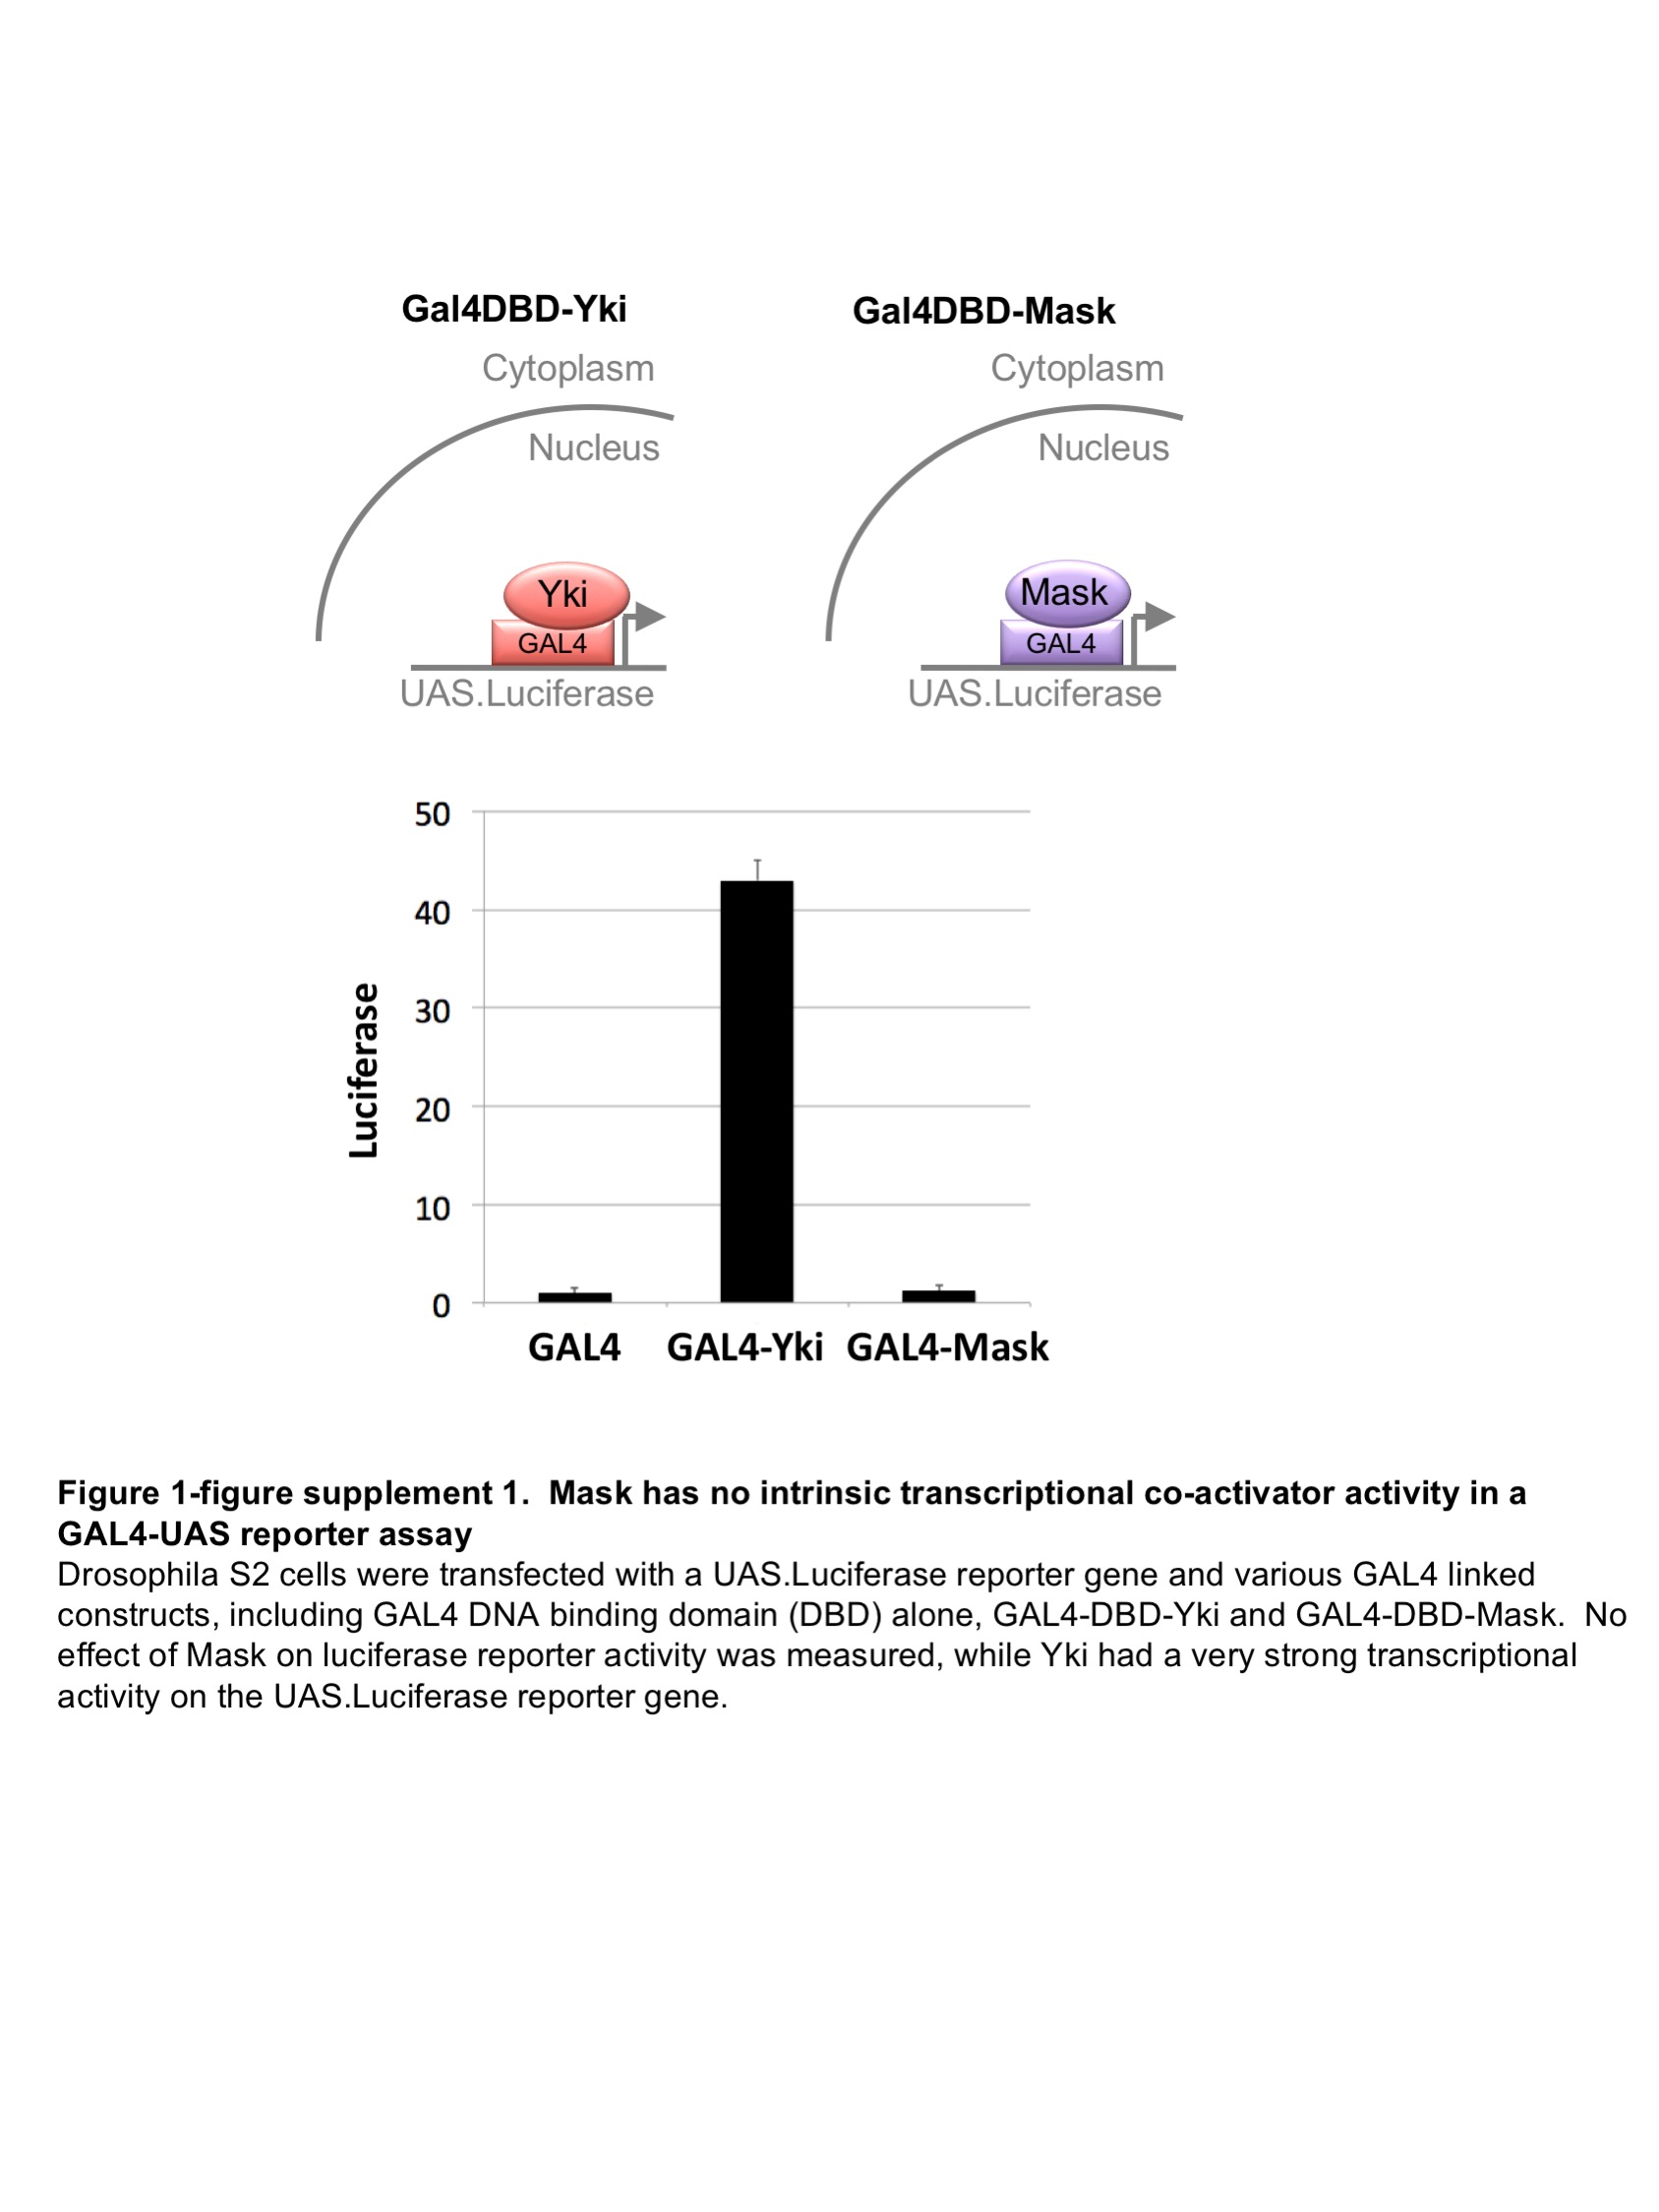

Supplement: supp [file elife-48601-supp-v1.zip › elife_poa_e48601_Figure_1_figure_supplement_1.jpg]

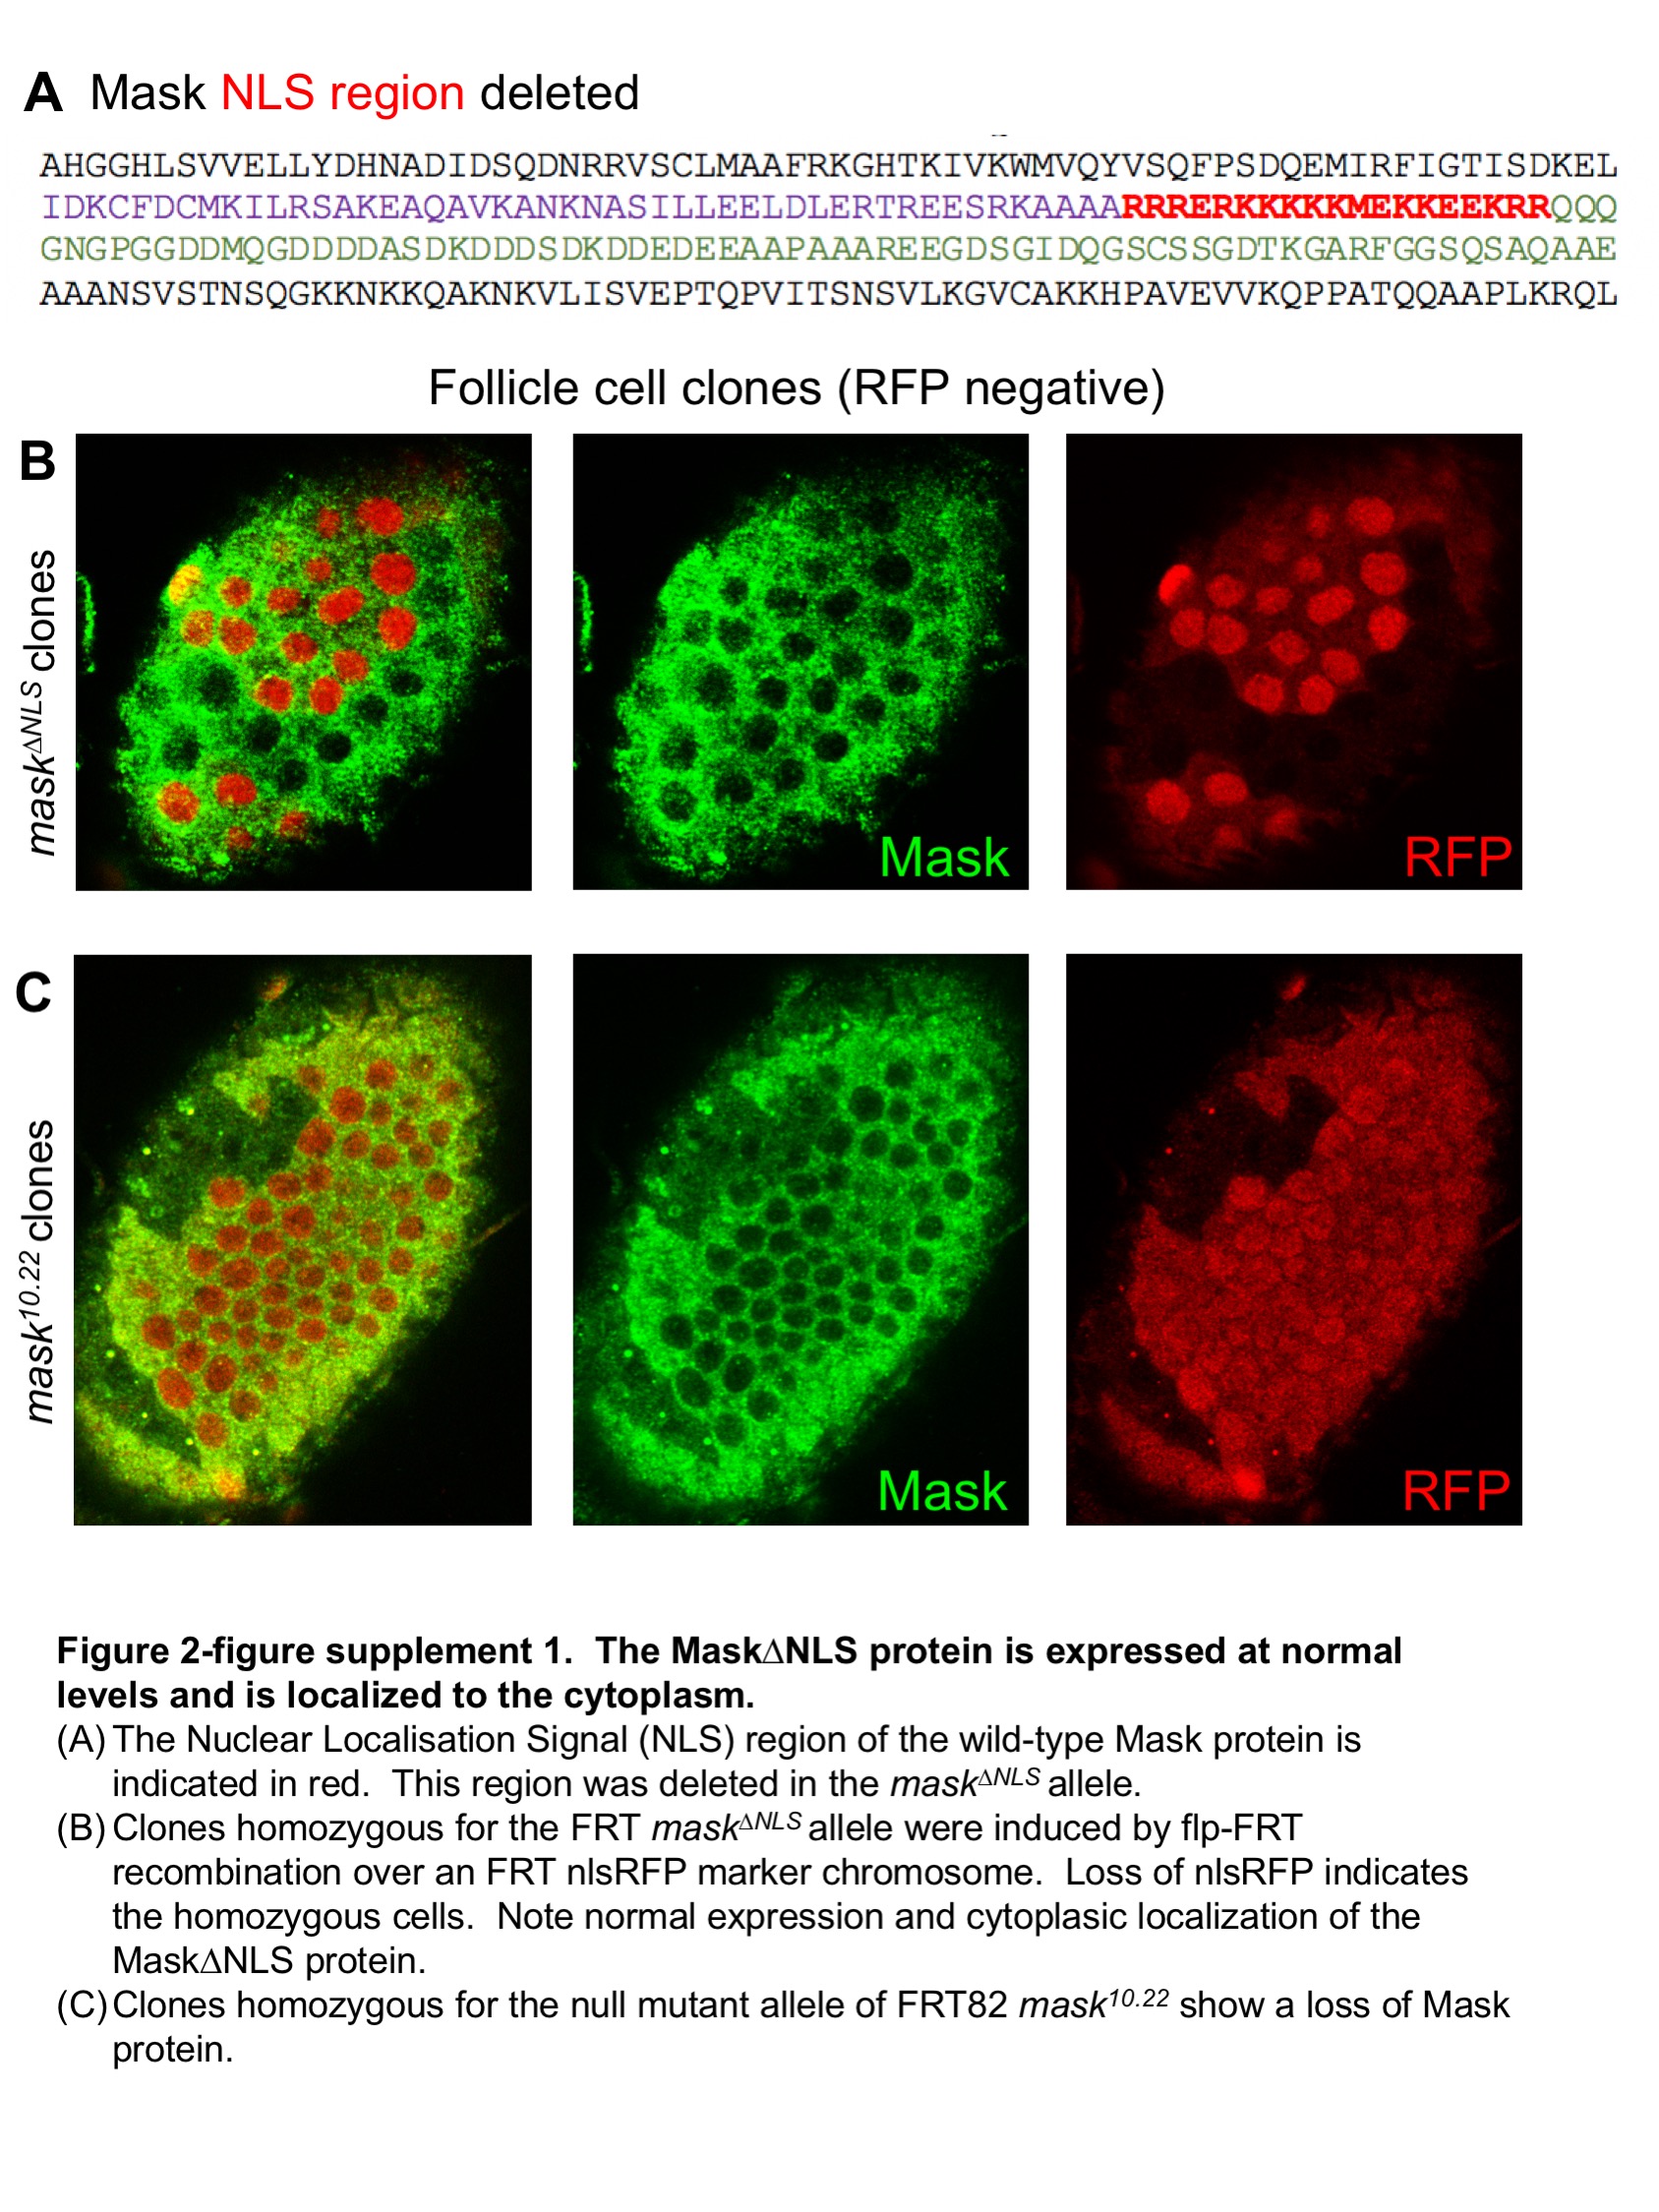

Supplement: supp [file elife-48601-supp-v1.zip › elife_poa_e48601_Figure_2_figure_supplement_1.jpg]

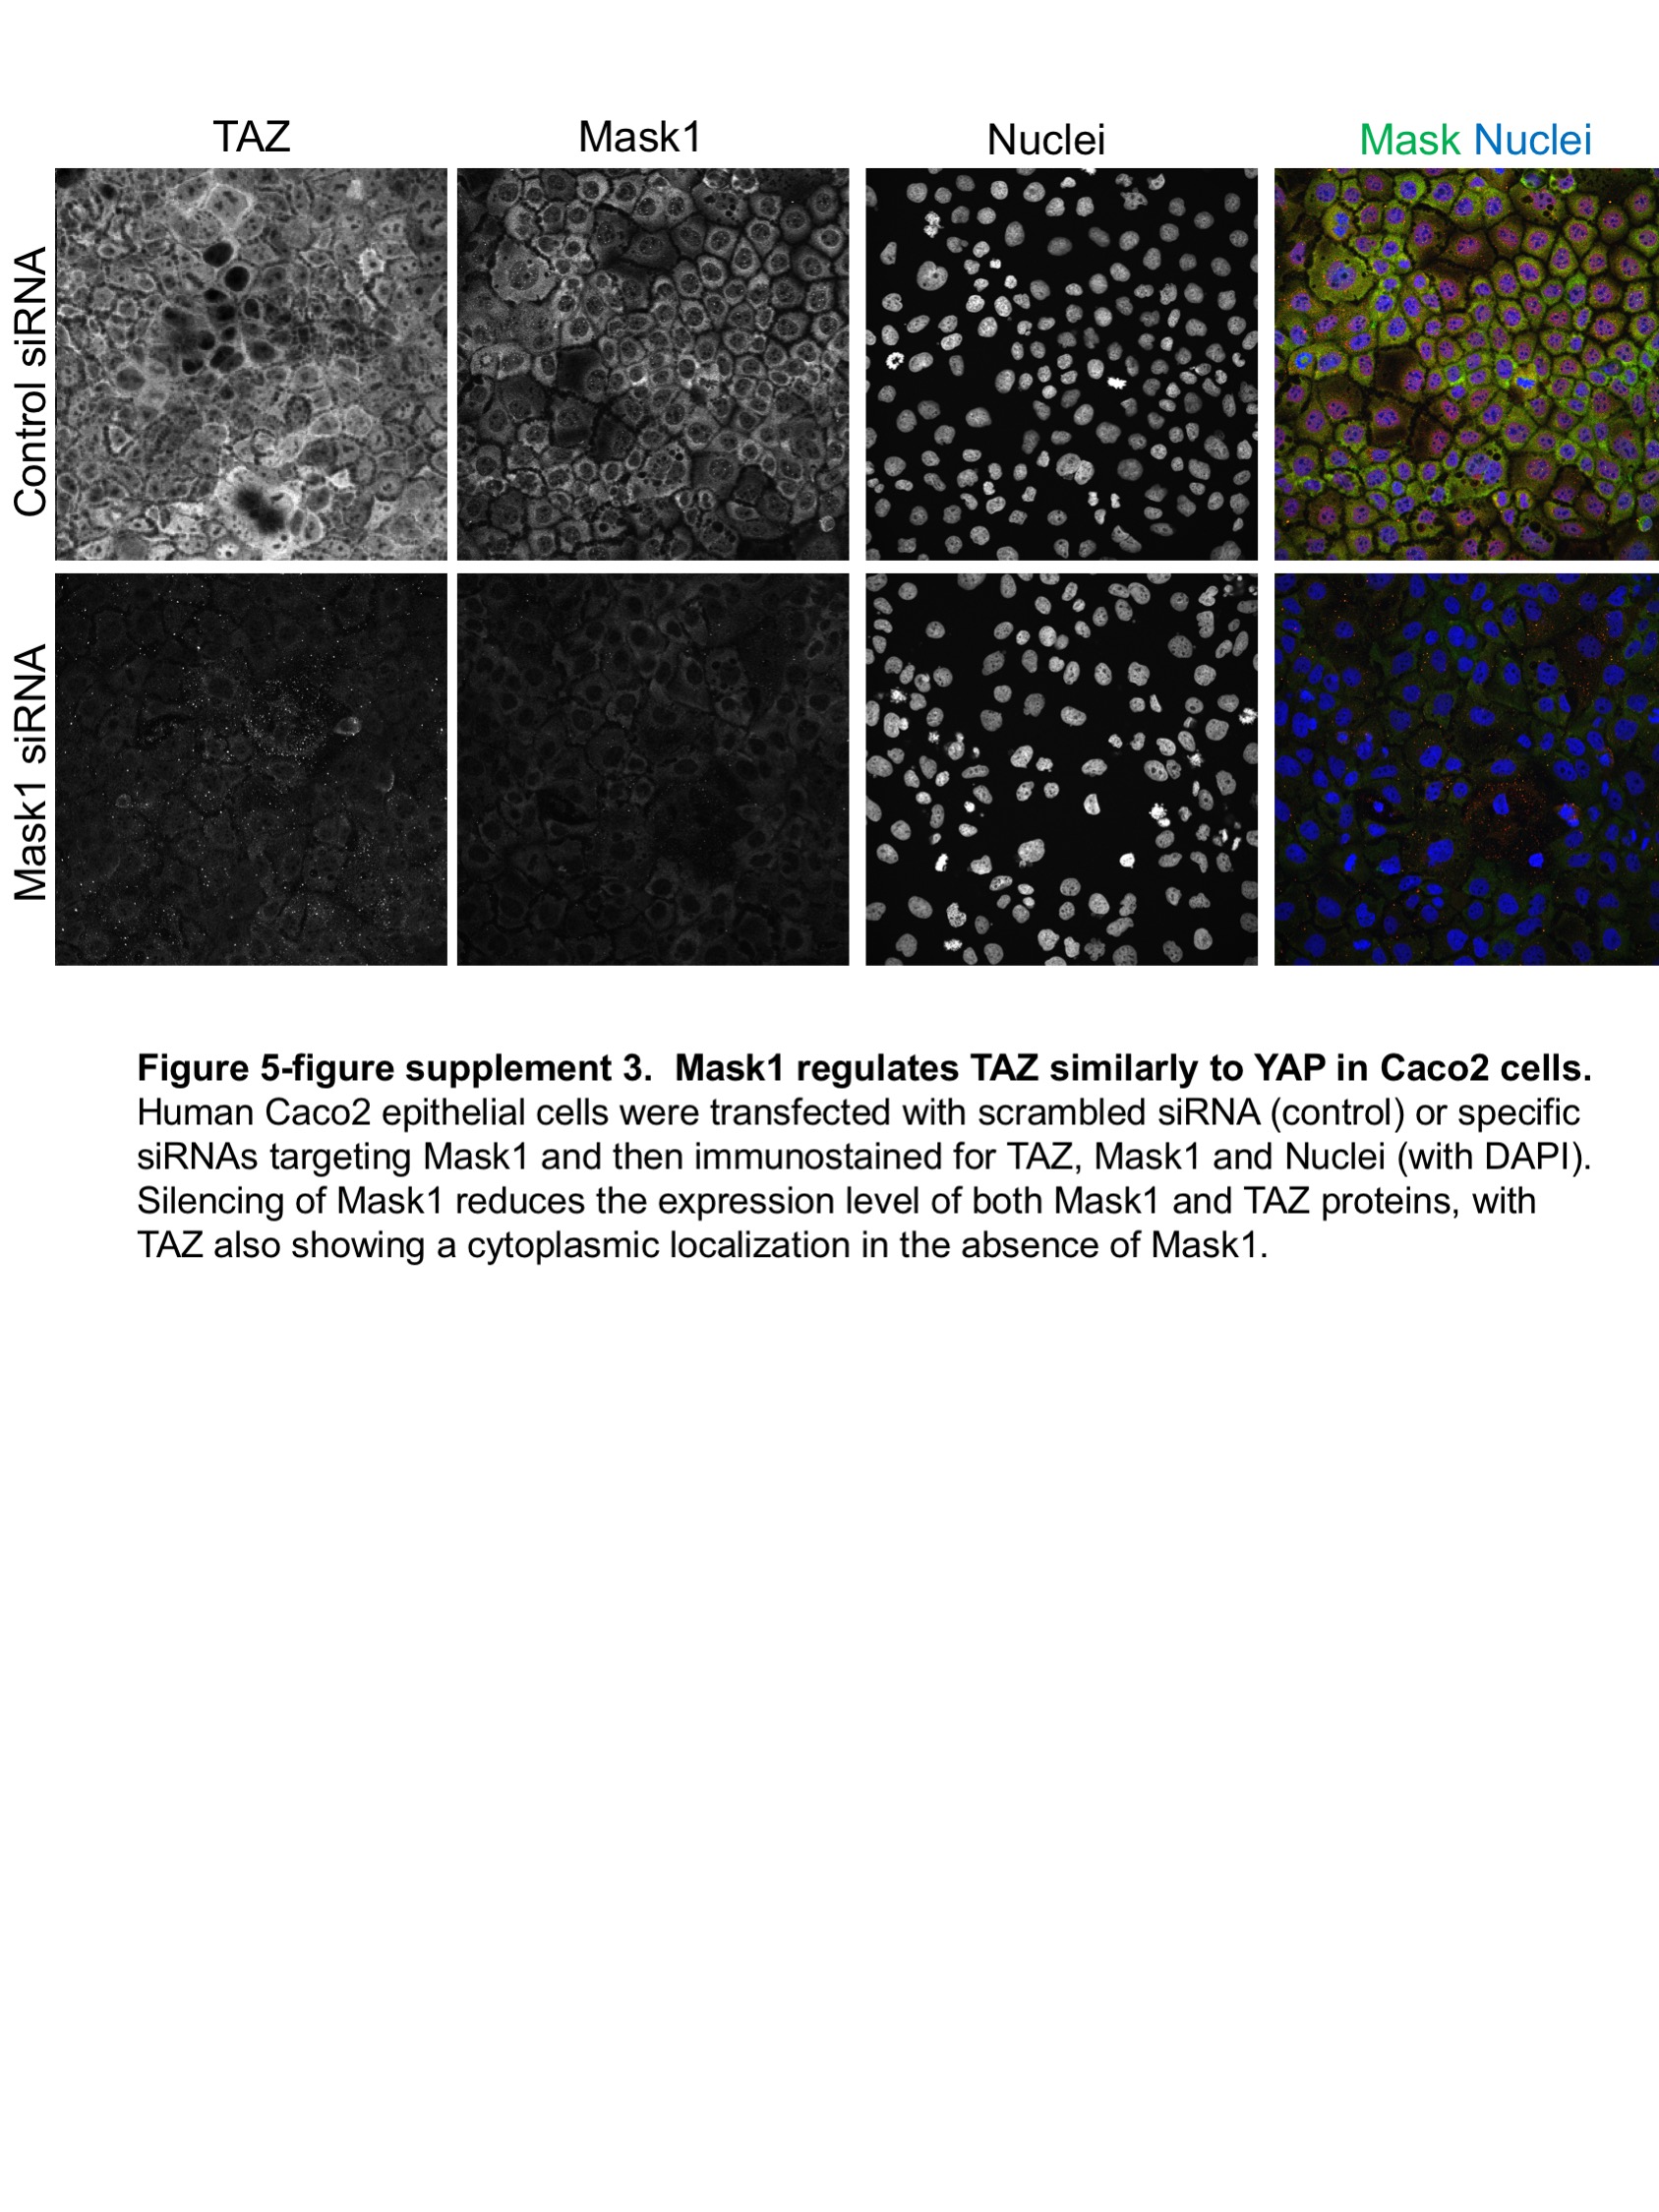

Supplement: supp [file elife-48601-supp-v1.zip › elife_poa_e48601_Figure_5_figure_supplement_3.jpg]

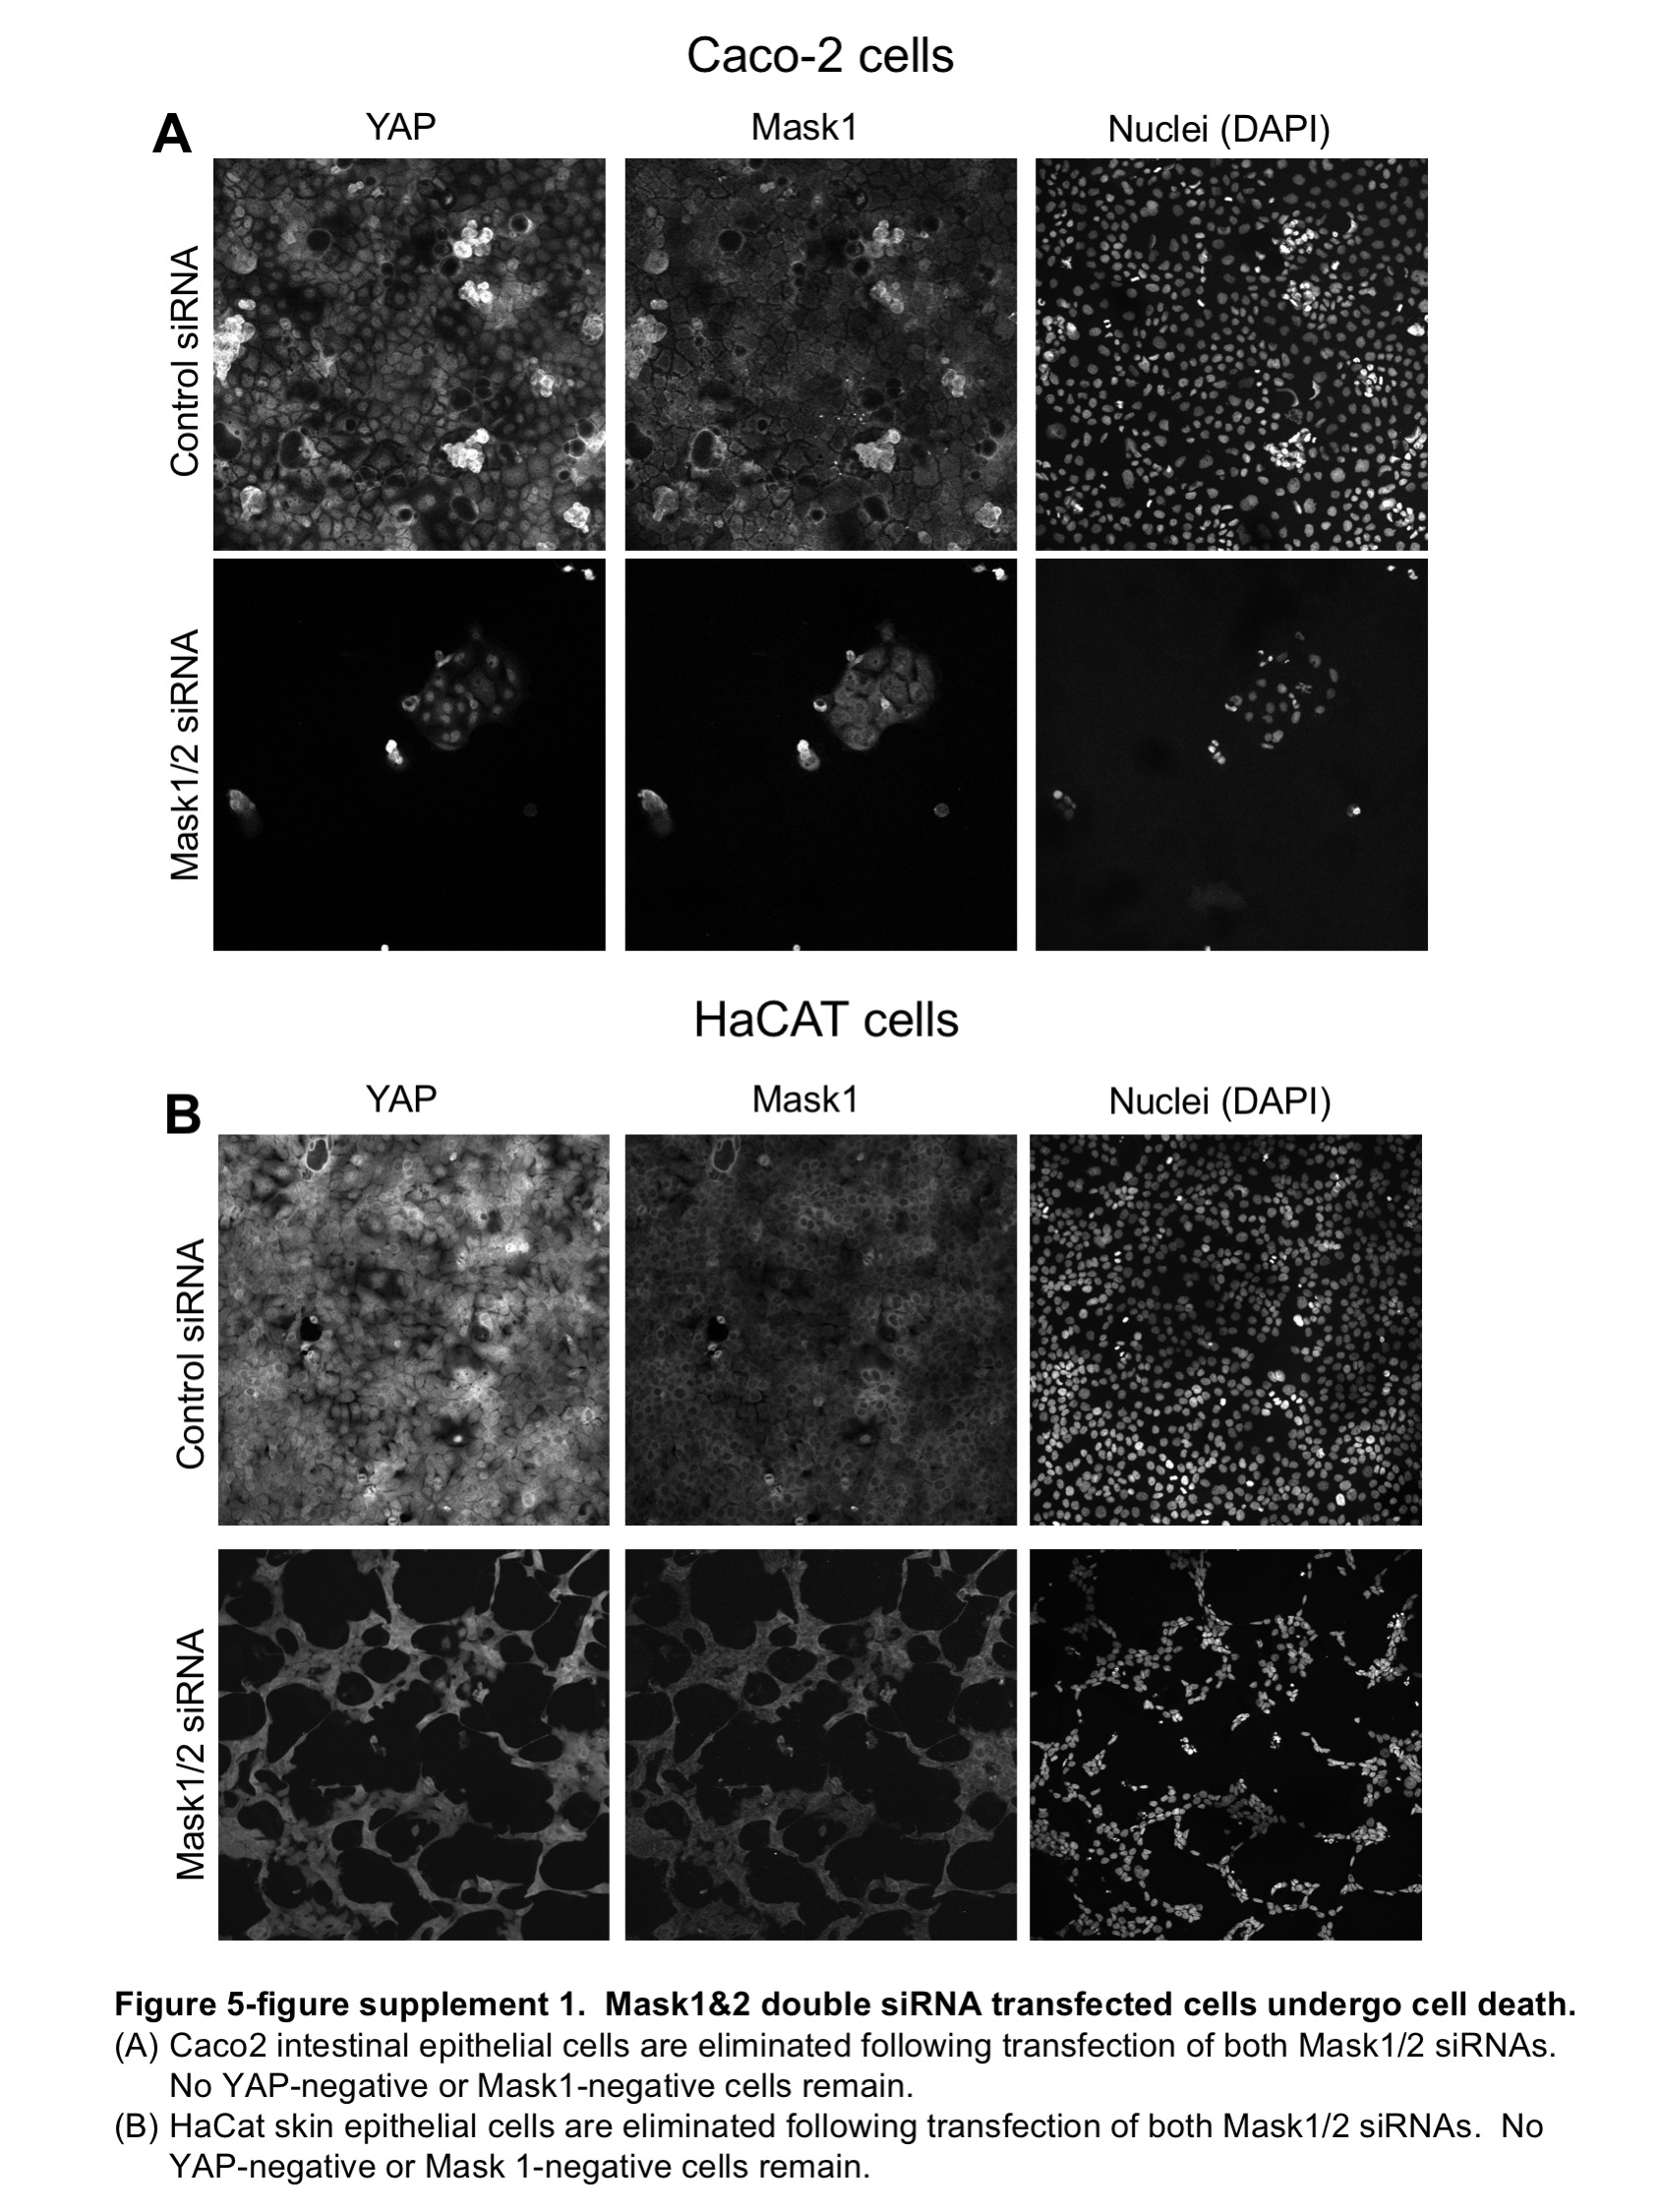

Supplement: supp [file elife-48601-supp-v1.zip › elife_poa_e48601_Figure_5_figure_supplement_1.jpg]

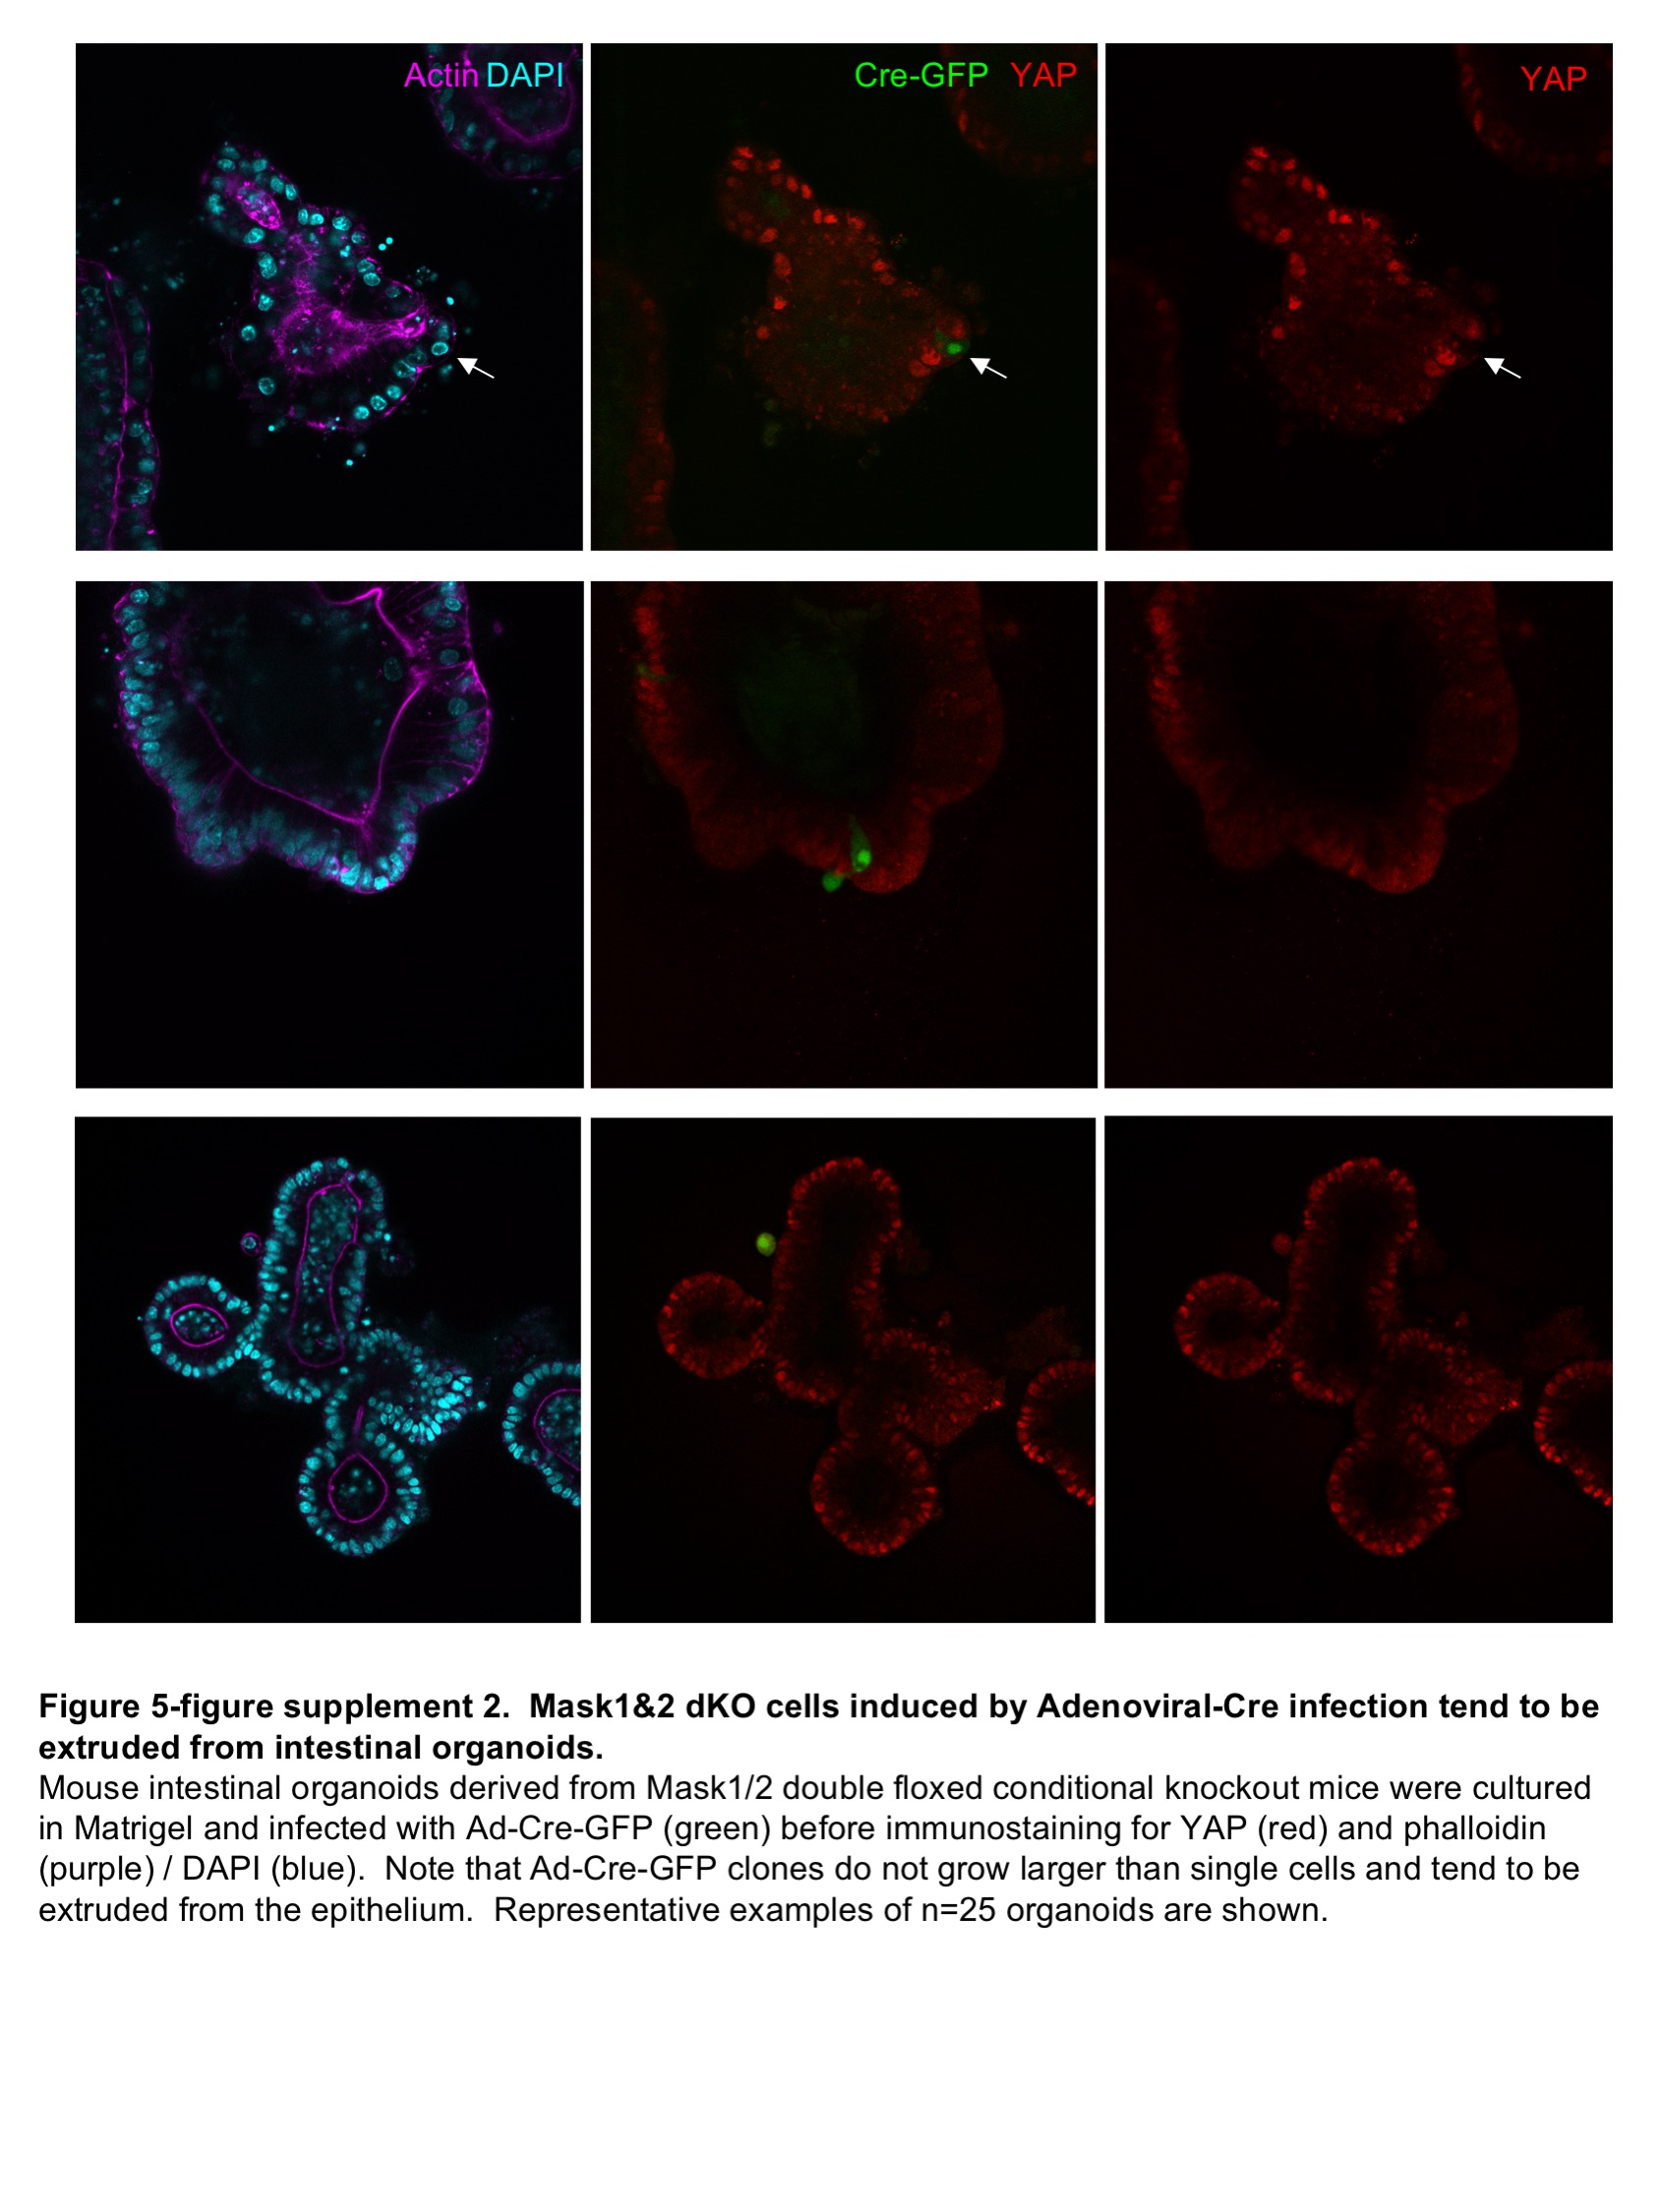

Supplement: supp [file elife-48601-supp-v1.zip › elife_poa_e48601_Figure_5_figure_supplement_2.jpg]
